# Supplementary material
Source: PubMed Central journal article supplement (PMC4913876)

# Figure 2a

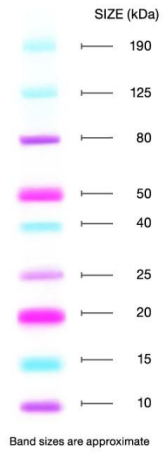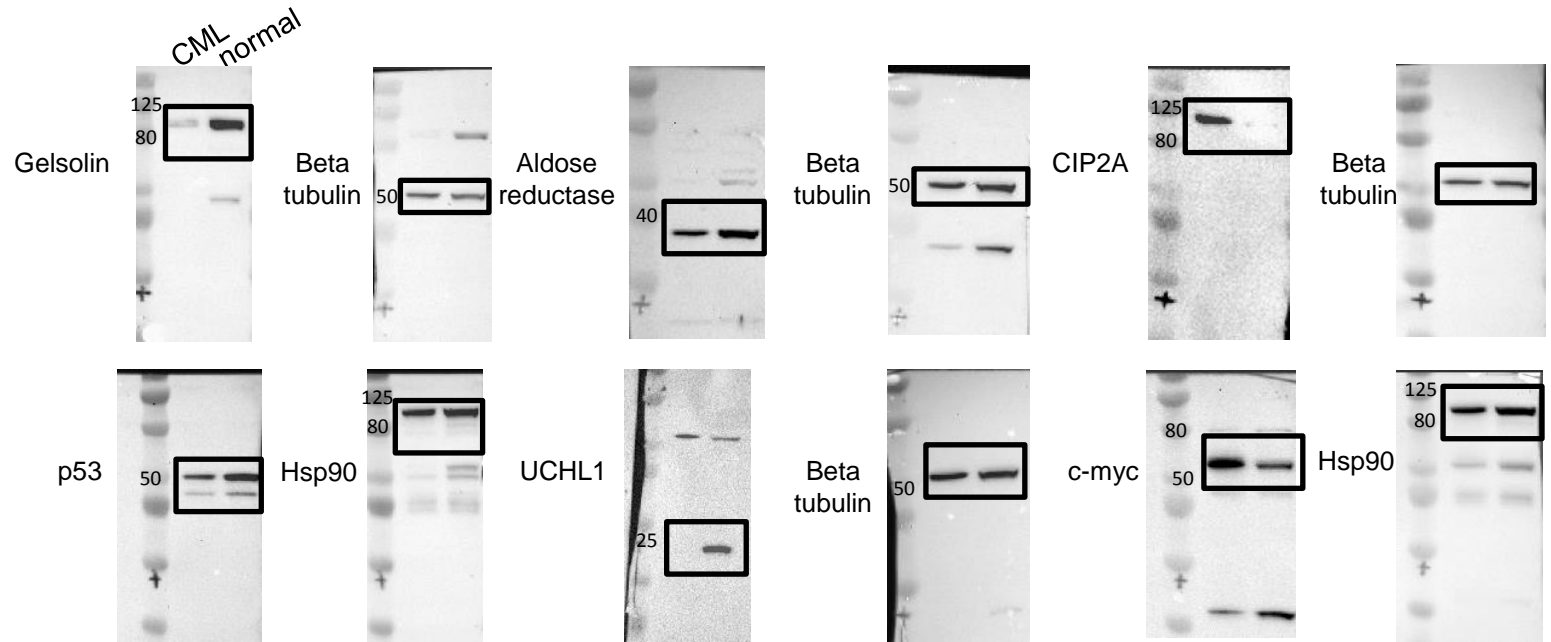

# Extended Data Figure 2a

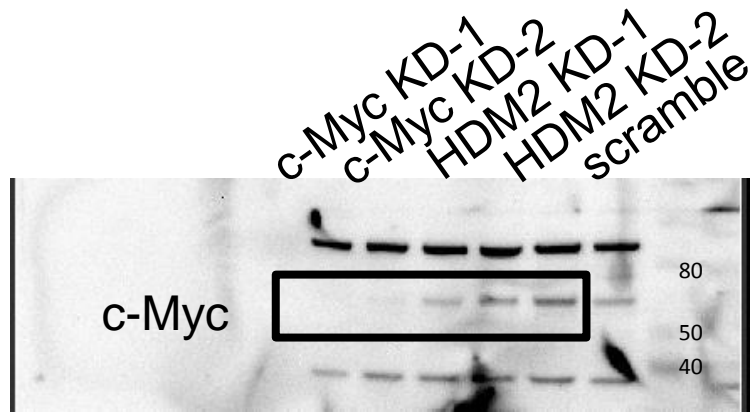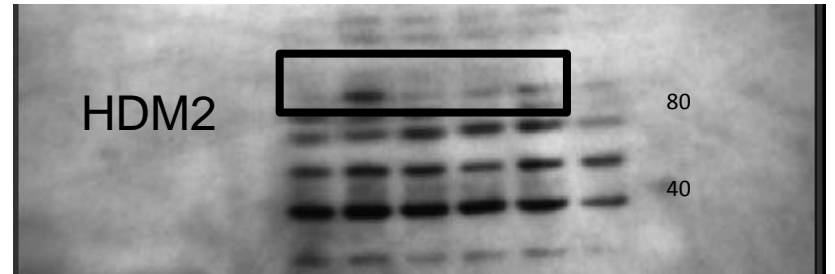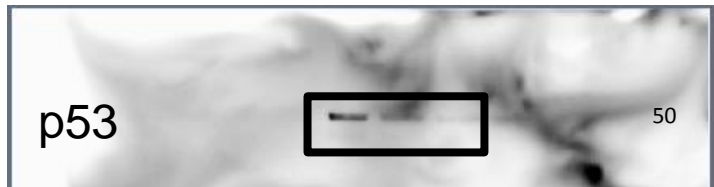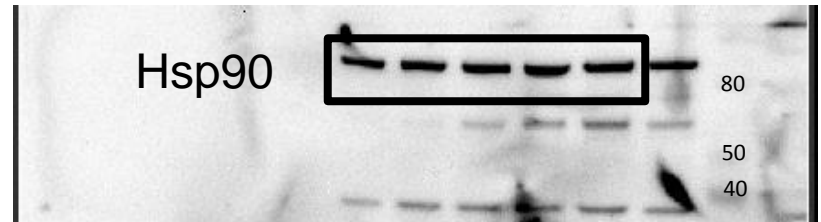

# Extended Figure 3a

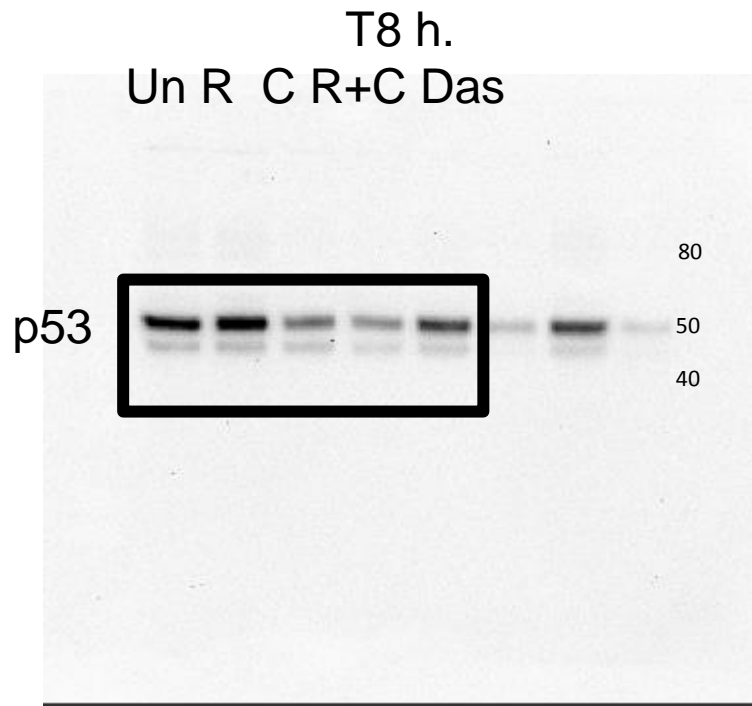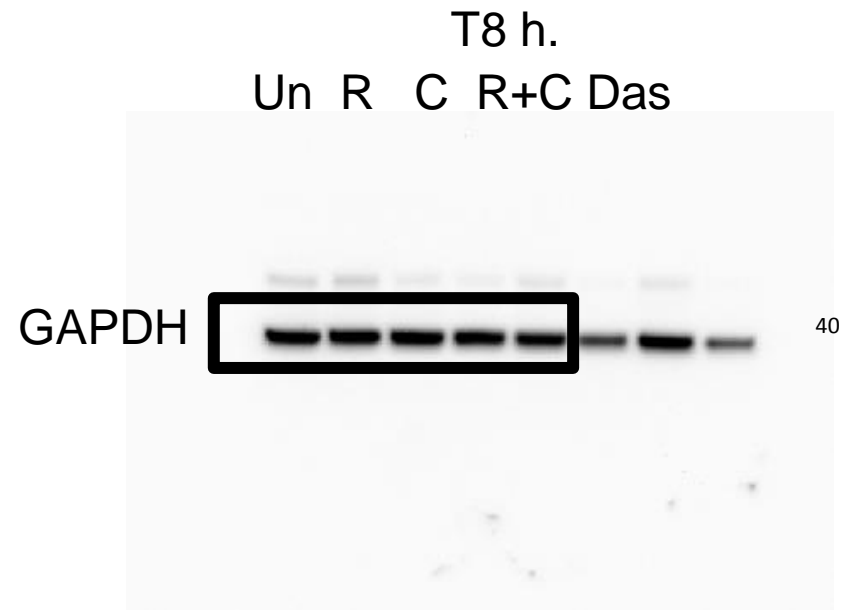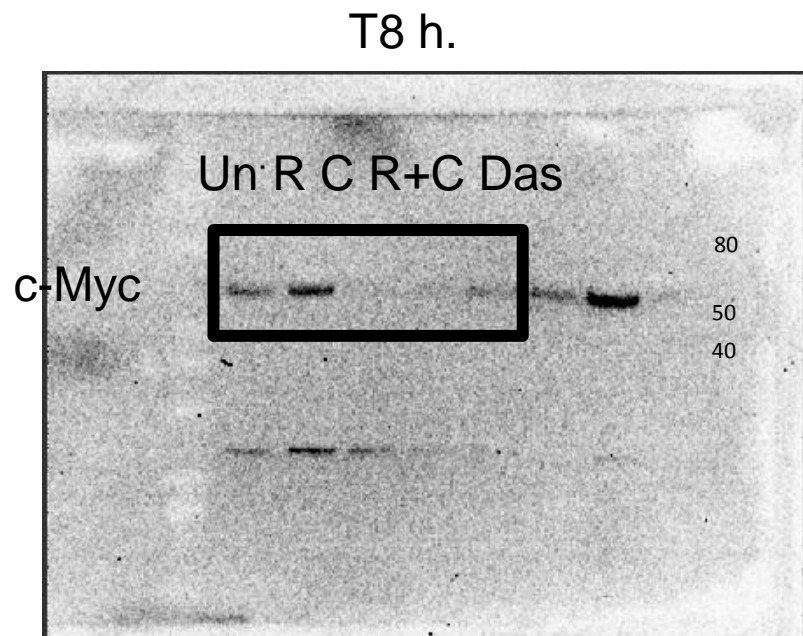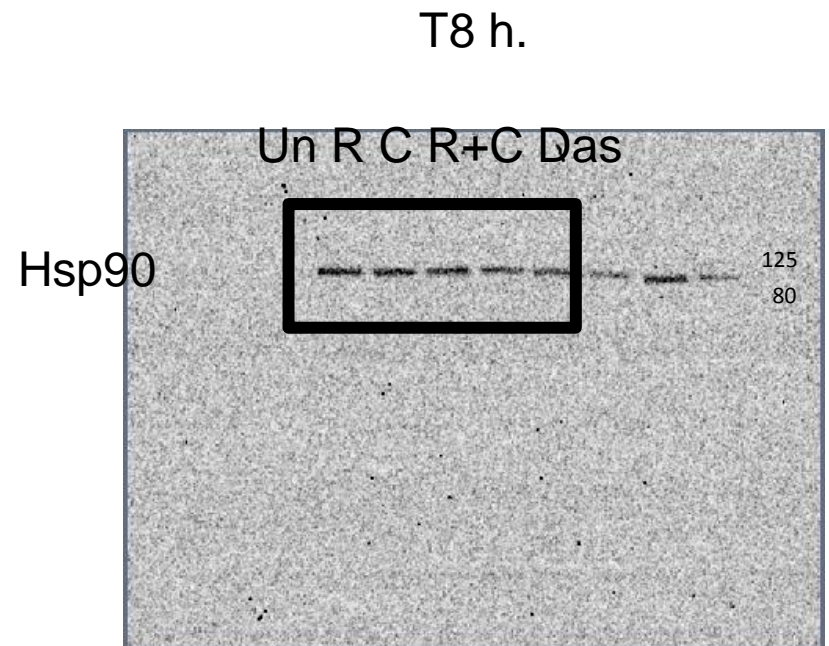

**Extended Data  
Figure 3b**

T48 h.

Un R C R+C Das

p53

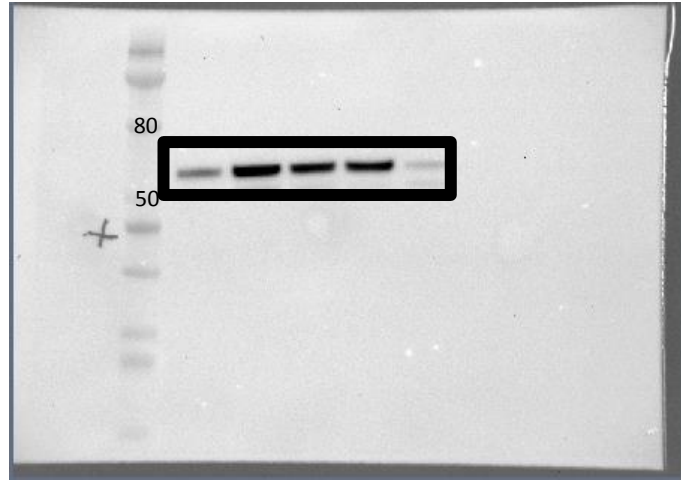

T48 h.

Un R C R+C Das

GAPDH

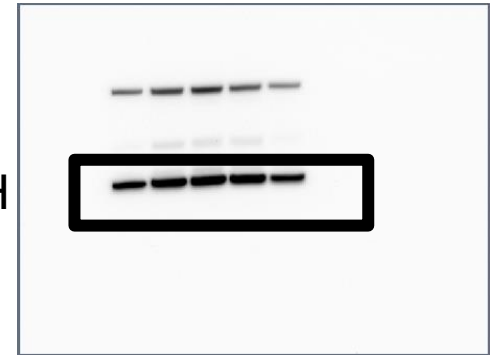

T48 h.

Un R C R+C Das

pSTAT5

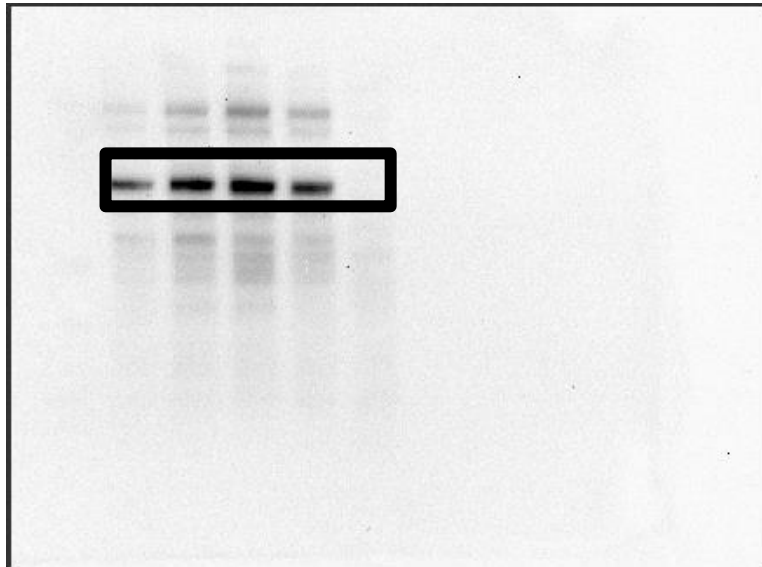

T48 h.

Un R C R+C Das

GAPDH

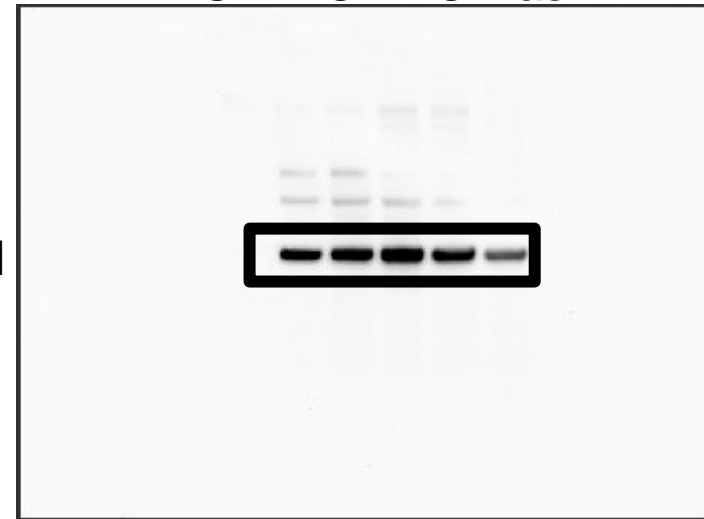

Supplement: NIHMS68258-supplement-Supplemental_Figure_1.pdf [file NIHMS68258-supplement-Supplemental_Figure_1.pdf]
