# Supplementary material
Source: PubMed Central journal article supplement (PMC4913876)
Supplement: NIHMS68258-supplement-Supplementary_Table_1.pdf [file NIHMS68258-supplement-Supplementary_Table_1.pdf]

| Network | HGNC     | Ensembl         | Uniprot | Description                                                                     |
|---------|----------|-----------------|---------|---------------------------------------------------------------------------------|
| x       | ABR      | ENSP00000303909 | Q12979  | Active breakpoint cluster region-related protein                                |
| x       | ACADS    | ENSP00000242592 | P16219  | Short-chain specific acyl-CoA dehydrogenase, mitochondrial                      |
| x       | AKR1A1   | ENSP00000312606 | P14550  | Alcohol dehydrogenase [NADP+]                                                   |
| x       | AKR1A1   | ENSP00000361140 | P14550  | Alcohol dehydrogenase [NADP+]                                                   |
| x       | AKR1B1   | ENSP00000285930 | P15121  | Aldose reductase                                                                |
| x       | ARHGDI1  | ENSP00000228945 | P52566  | Rho GDP-dissociation inhibitor 2                                                |
| x       | ARL1     | ENSP00000261636 | P40616  | ADP-ribosylation factor-like protein 1                                          |
| x       | BAK1     | ENSP00000363591 | Q16611  | Bcl-2 homologous antagonist/killer                                              |
| x       | CNN2     | ENSP00000411272 | B4DHU5  | cDNA FLJ52495, highly similar to Calponin-2                                     |
| x       | CPD      | ENSP00000225719 | O75976  | Carboxypeptidase D Precursor                                                    |
| x       | CTSD     | ENSP00000384947 | P07339  | Cathepsin D Precursor                                                           |
| x       | DDAH2    | ENSP00000412800 | O95865  | N(G),N(G)-dimethylarginine dimethylaminohydrolase 2                             |
| x       | GBP2     | ENSP00000359497 | P32456  | Interferon-induced guanylate-binding protein 2                                  |
| x       | GLUL     | ENSP00000356537 | P15104  | Glutamine synthetase                                                            |
| x       | GRIN1    | ENSP00000360616 | Q05586  | Glutamate [NMDA] receptor subunit zeta-1 Precursor                              |
| x       | GSN      | ENSP00000362924 | P06396  | Gelsolin Precursor                                                              |
| x       | GSTP1    | ENSP00000381607 | P09211  | Glutathione S-transferase P                                                     |
| x       | GYG1     | ENSP00000340736 | P46976  | Glycogenin-1                                                                    |
| x       | INPP4B   | ENSP00000422793 | B7Z4Z0  | cDNA FLJ51916, highly similar to Type II inositol-3,4-bisphosphate4-phosphatase |
| x       | KIAA1524 | ENSP00000295746 | Q8TCG1  | Protein CIP2A                                                                   |
| x       | LTA4H    | ENSP00000228740 | P09960  | Leukotriene A-4 hydrolase                                                       |
| x       | MRPL1    | ENSP00000315017 | Q9BYD6  | 39S ribosomal protein L1, mitochondrial Precursor                               |
| x       | MVP      | ENSP00000387497 | B4DP93  | cDNA FLJ53437, highly similar to Major vault protein                            |
| x       | MVP      | ENSP00000349977 | Q14764  | Major vault protein                                                             |
| x       | MVP      | ENSP00000378760 | Q14764  | Major vault protein                                                             |
| x       | PPM1A    | ENSP00000327255 | P35813  | Protein phosphatase 1A                                                          |
| x       | PURA     | ENSP00000332706 | Q00577  | Transcriptional activator protein Pur-alpha                                     |

|   |          |                 |        |                                                                      |
|---|----------|-----------------|--------|----------------------------------------------------------------------|
| x | SCAMP3   | ENSP00000307275 | O14828 | Secretory carrier-associated membrane protein 3                      |
| x | SRPK1    | ENSP00000391069 | Q96SB4 | Serine/threonine-protein kinase SRPK1                                |
| x | TARDBP   | ENSP00000240185 | Q13148 | TAR DNA-binding protein 43                                           |
| x | TSNAX    | ENSP00000355599 | Q99598 | Translin-associated protein X                                        |
| x | UCHL1    | ENSP00000426895 |        | ubiquitin carboxyl-terminal esterase L1                              |
| x | UROD     | ENSP00000246337 | P06132 | Uroporphyrinogen decarboxylase                                       |
|   | ACSL1    | ENSP00000391600 |        | acyl-CoA synthetase long-chain family member 1??                     |
|   | ARL8B    | ENSP00000414192 | Q9NVJ2 | ADP-ribosylation factor-like protein 8B                              |
|   | BRWD2    | ENSP00000263461 | Q9BZH6 | Bromodomain and WD repeat-containing protein 2                       |
|   | DDX60    | ENSP00000377344 | Q8IY21 | Probable ATP-dependent RNA helicase DDX60                            |
|   | DOCK2    | ENSP00000256935 | Q92608 | Dedicator of cytokinesis protein 2                                   |
|   | DONSON   | ENSP00000413235 | A6NDZ2 | Putative uncharacterized protein DONSON                              |
|   | ERAP2    | ENSP00000400376 | Q6P179 | Endoplasmic reticulum aminopeptidase 2                               |
|   | GPR160   | ENSP00000348161 | Q9UJ42 | Probable G-protein coupled receptor 160                              |
|   | HEXB     | ENSP00000261416 | P07686 | Beta-hexosaminidase subunit beta                                     |
|   | HLA-DPB1 | ENSP00000414196 | B5U899 | MHC class II antigen Fragment                                        |
|   | ISOC2    | ENSP00000401726 | Q96AB3 | Isochorismatase domain-containing protein 2, mitochondrial Precursor |
|   | KIAA0430 | ENSP00000379654 | Q9Y4F3 | Limkain-b1                                                           |
|   | KIAA1279 | ENSP00000354848 | Q96EK5 | KIF1-binding protein                                                 |
|   | KIF2A    | ENSP00000423772 | B0AZS5 | cDNA, FLJ79515, highly similar to Kinesin-like protein KIF2          |
|   | KTELC1   | ENSP00000295588 | Q8NBL1 | KTEL motif-containing protein 1 Precursor                            |
|   | LSG1     | ENSP00000265245 | Q9H089 | Large subunit GTPase 1 homolog                                       |
|   | MPI      | ENSP00000318318 | P34949 | Mannose-6-phosphate isomerase                                        |
|   | NDUF4F4  | ENSP00000358272 | Q9P032 | NADH dehydrogenase [ubiquinone] 1 alpha subcomplex assembly factor 4 |
|   | RAB27A   | ENSP00000407887 | P51159 | Ras-related protein Rab-27A                                          |
|   | SH2D3A   | ENSP00000245908 | Q9BRG2 | SH2 domain-containing protein 3A                                     |
|   | SPATA5L1 | ENSP00000305494 | Q9BVQ7 | Spermatogenesis-associated protein 5-like protein 1                  |
|   | WDR1     | ENSP00000427687 | B4DY05 | cDNA FLJ58303, highly similar to WD repeat protein 1                 |

|       |                 |        |                                              |
|-------|-----------------|--------|----------------------------------------------|
| WDR26 | ENSP00000408108 | Q9H7D7 | WD repeat-containing protein 26              |
| WDR44 | ENSP00000389457 | Q5JSH4 | WD repeat domain 44 Fragment                 |
| ZC3H8 | ENSP00000386488 | Q8N5P1 | Zinc finger CCCH domain-containing protein 8 |
