# Supplementary material
Source: PubMed Central journal article supplement (PMC4913876)
Supplement: NIHMS68258-supplement-Supplementary_Table_3.pdf [file NIHMS68258-supplement-Supplementary_Table_3.pdf]

| Signature set | MSigDB signature                            | MSigDB signature size | # overlap | % overlap | Genes (HGNC)                                  | Enrichment |
|---------------|---------------------------------------------|-----------------------|-----------|-----------|-----------------------------------------------|------------|
| CML           | DIAZ_CHRONIC_MEYLOGENOUS_LEUKEMIA_UP        | 1374                  | 8         | 27.59     | ARL1,CPD,INPP4B,PPM1A,SRPK1,TARDBP,TSNAX,UROD | 0.00       |
| MYC           | DANG_BOUND_BY_MYC                           | 1053                  | 7         | 24.14     | AKR1A1,ARL1,GSTP1,LTA4H,SCAMP3,UCHL1,UROD     | 0.00       |
| MYC           | FERNANDEZ_BOUND_BY_MYC                      | 176                   | 3         | 10.34     | AKR1A1,GSTP1,UROD                             | 0.00       |
| MYC           | BENPORATH_MYC_TARGETS_WITH_EBOX             | 229                   | 3         | 10.34     | AKR1A1,GSTP1,UROD                             | 0.01       |
| MYC           | DANG_REGULATED_BY_MYC_UP                    | 68                    | 2         | 6.90      | SRPK1,UCHL1                                   | 0.01       |
| MYC           | DANG_MYC_TARGETS_UP                         | 130                   | 2         | 6.90      | LTA4H,UCHL1                                   | 0.02       |
| MYC           | BENPORATH_MYC_MAX_TARGETS                   | 775                   | 4         | 13.79     | ARL1,LTA4H,SCAMP3,UCHL1                       | 0.03       |
| MYC           | DANG_REGULATED_BY_MYC_DN                    | 243                   | 2         | 6.90      | CPD,GBP2                                      | 0.06       |
| p53           | AMUNDSON_DNA_DAMAGE_RESPONSE_TP53           | 16                    | 1         | 3.45      | CTSD                                          | 0.06       |
| p53           | KANNAN_TP53_TARGETS_DN                      | 16                    | 1         | 3.45      | PURA                                          | 0.06       |
| MYC           | SCHLOSSER_MYC_AND_SERUM_RESPONSE_SYNERGY    | 31                    | 1         | 3.45      | SCAMP3                                        | 0.08       |
| CML           | GRAHAM_CML QUIESCENT_VS_NORMAL QUIESCENT_DN | 45                    | 1         | 3.45      | GBP2                                          | 0.10       |
| MYC           | SCHLOSSER_MYC_TARGETS_AND_SERUM_RESPONSE_DN | 47                    | 1         | 3.45      | SRPK1                                         | 0.10       |
| p53           | KANNAN_TP53_TARGETS_UP                      | 48                    | 1         | 3.45      | BAK1                                          | 0.11       |
| MYC           | LEE_LIVER_CANCER_MYC_UP                     | 51                    | 1         | 3.45      | GLUL                                          | 0.11       |
| MYC           | LEE_LIVER_CANCER_MYC_TGFA_UP                | 59                    | 1         | 3.45      | AKR1B1                                        | 0.12       |
| CML           | GRAHAM_CML_DIVIDING_VS_NORMAL QUIESCENT_DN  | 95                    | 1         | 3.45      | GBP2                                          | 0.16       |
| MYC           | SCHLOSSER_SERUM_RESPONSE_AUGMENTED_BY_MYC   | 106                   | 1         | 3.45      | PURA                                          | 0.17       |
| CML           | DIAZ_CHRONIC_MEYLOGENOUS_LEUKEMIA_DN        | 114                   | 1         | 3.45      | MVP                                           | 0.18       |
| MYC           | KIM_MYC_AMPLIFICATION_TARGETS_UP            | 157                   | 1         | 3.45      | AKR1B1                                        | 0.22       |
| MYC           | BILD_MYC_ONCOGENIC_SIGNATURE                | 201                   | 1         | 3.45      | DDAH2                                         | 0.25       |
