# Supplementary material
Source: PubMed Central journal article supplement (PMC4913876)
Supplement: NIHMS68258-supplement-Supplementary_Table_4.pdf [file NIHMS68258-supplement-Supplementary_Table_4.pdf]

| Public_ID | phase | Sex | ELN response <sup>1</sup>      | Figure/Experiment                                                                                                                  |
|-----------|-------|-----|--------------------------------|------------------------------------------------------------------------------------------------------------------------------------|
| 1         | CP    | F   | Optimal: IM                    | <b>Fig. 2:</b> Immunofluorescence<br><b>Fig. 3:</b> RITA, CPI-203 titration, cell viability, apoptosis                             |
| 2         | CP    | -   | Optimal: IM                    | <b>Fig. 1:</b> Mass spectrometry                                                                                                   |
| 3         | CP    | M   | Optimal: IM                    | <b>Fig. 1:</b> Mass spectrometry                                                                                                   |
| 4         | CP    | F   | Failure: IM                    | <b>Fig. 1:</b> Mass spectrometry                                                                                                   |
| 5         | CP    | F   | Optimal: Nil                   | <b>Fig. 1:</b> Mass spectrometry                                                                                                   |
| 6         | CP    | F   | Failure: IM                    | <b>Fig. 1:</b> Mass spectrometry                                                                                                   |
| 7         | CP    | M   | Optimal: IM                    | <b>Fig. 2/3:</b> Knock-down studies<br><b>Fig. 3:</b> Sequential inhibitor treatments                                              |
| 8         | CP    | F   | Optimal: IM                    | <b>Fig. 2/3:</b> Knock-down studies<br><b>Fig. 3:</b> Sequential inhibitor treatments                                              |
| 9         | CP    | F   | Failure: Nil                   | <b>Fig. 2/3:</b> Knock-down studies<br><b>Fig. 3:</b> Sequential inhibitor treatments<br><b>Fig. 3:</b> CFC assay                  |
| 10        | CP    | F   | Warning: IM                    | <b>Fig. 2:</b> Western blot<br><b>Fig. 2:</b> Immunofluorescence<br><b>Fig. 2/3:</b> Knock-down studies                            |
| 12        | CP    | M   | Warning: IM                    | <b>Fig. 3:</b> CFC assay                                                                                                           |
| 11        | CP    | F   | Warning: IM                    | <b>Fig. 2/3:</b> Knock-down studies                                                                                                |
| 13        | CP    | M   | Failure: IM                    | <b>Fig. 2:</b> Immunofluorescence<br><b>Fig. 3:</b> CFC assay                                                                      |
| 14        | CP    | F   | Optimal: IM                    | <b>Fig. 2:</b> Western blot                                                                                                        |
| 15        | CP    | M   | Warning: IM<br>Optimal: Nil    | <b>Fig. 2:</b> Western blot<br><b>Fig. 2:</b> Immunofluorescence                                                                   |
| 16        | CP    | F   | Failure: IM<br>Optimal: Nil    | <b>Fig. 2:</b> Immunofluorescence<br><b>Fig. 3:</b> RITA, CPI-203 titration, cell viability, apoptosis<br><b>Fig. 3:</b> CFC assay |
| 17        | CP    | M   | Warning: IM                    | <b>Fig. 3/4:</b> CFSE                                                                                                              |
| 18        | CP    | F   | Failure: IM<br>Optimal: Nil    | <b>Fig. 3/4:</b> CFSE<br><b>Fig. 3:</b> Nutlin and CPI-203 titration and CFC assay                                                 |
| 19        | CP    | M   | Intolerant: Das<br>Optimal: IM | <b>Fig. 3:</b> RITA, CPI-203 titration, cell viability, apoptosis<br><b>Fig. 3:</b> CFC assay<br><b>Fig. 3/4:</b> CFSE             |

|    |    |   |                             |                                                                                                                                                                                                                                                                                             |
|----|----|---|-----------------------------|---------------------------------------------------------------------------------------------------------------------------------------------------------------------------------------------------------------------------------------------------------------------------------------------|
| 20 | CP | F | Warning: IM                 | <p><b>Fig. 2:</b> Immunofluorescence</p> <p><b>Fig. 3:</b> RITA, CPI-203 titration, cell viability, apoptosis</p> <p><b>Fig. 3:</b> CFC assay</p> <p><b>Fig. 3/4:</b> CFSE</p>                                                                                                              |
| 21 | CP | F | Optimal: IM                 | <b>Fig. 2/3:</b> Knock-down studies                                                                                                                                                                                                                                                         |
| 22 | CP | F | Optimal: Das                | <p><b>Fig. 2:</b> Immunofluorescence</p> <p><b>Fig. 3:</b> RITA, CPI-203 titration, cell viability, apoptosis</p> <p><b>Fig. 3:</b> Nutlin and CPI-203 titration and CFC assay</p> <p><b>Fig. 2/3:</b> Knock-down studies</p> <p><b>Fig. 3/4:</b> CFSE</p> <p><b>Fig. 5:</b> RNA-seq S1</p> |
| 23 | CP | F | Optimal: Nil                | <b>Fig. 3:</b> Nutlin and CPI-203 titration and CFC assay                                                                                                                                                                                                                                   |
| 24 | CP | F | Warning: IM                 | <p><b>Fig. 2/3:</b> Knock-down studies</p> <p><b>Fig. 3/4:</b> CFSE</p>                                                                                                                                                                                                                     |
| 25 | CP | F | Optimal: Das                | <p><b>Fig. 3/4:</b> CFSE</p> <p><b>Fig. 5:</b> RNA-seq S2</p>                                                                                                                                                                                                                               |
| 26 | CP | M | Warning: IM                 | <p><b>Fig. 3/4:</b> CFSE</p> <p><b>Fig. 5:</b> RNA-seq S3</p>                                                                                                                                                                                                                               |
| 27 | CP | M | Warning: Das                | <p><b>Fig. 4:</b> NGS engraftment</p> <p><b>Fig. X:</b> Drug treated NSG</p>                                                                                                                                                                                                                |
| 28 | CP | F | Warning: IM                 | <b>Fig. 2:</b> Western blot                                                                                                                                                                                                                                                                 |
| 29 | CP | F | Optimal: IM                 | <b>Fig. 2/3:</b> Knock-down studies                                                                                                                                                                                                                                                         |
| 30 | CP | M | Newly diagnosed no followup | <b>Fig. 3:</b> CFC assay                                                                                                                                                                                                                                                                    |
| 31 | CP | M | Failure: Nil                | <b>Fig. 6:</b> Drug treated NSG                                                                                                                                                                                                                                                             |
| 32 | CP | M | Newly diagnosed no followup | <b>Fig. 6:</b> Drug treated NSG                                                                                                                                                                                                                                                             |

1 ELN response criteria: Baccarani et al., 2013; Blood 122(6):872-84.
