# Supplementary material
Source: PubMed Central journal article supplement (PMC4913876)
Supplement: NIHMS68258-supplement-Supplementary_Table_8.pdf [file NIHMS68258-supplement-Supplementary_Table_8.pdf]

|                                            | clone   | chromophore  | company        | catalogue number |
|--------------------------------------------|---------|--------------|----------------|------------------|
| Mouse anti human CD19                      | SJ25C1  | PE/Cy7       | BD Pharmingen  | 557835           |
| Rat anti mouse CD45                        | 30-F11  | PerCP        | BD Pharmingen  | 550994           |
| Mouse anti human CD11b                     | M1/69   | APC/Cy7      | BD Pharmingen  | 557754           |
| Rat anti mouse CD11b                       | M1/70   | PE/Cy7       | BD Pharmingen  | 552850           |
| Mouse anti human CD14                      | M5E2    | PerCP/Cy5.5  | BD Pharmingen  | 561116           |
| Rat anti mouse CD45                        | 30-F11  | APC          | BD Pharmingen  | 559864           |
| Rat anti mouse CD45                        | 30-F11  | PerCP        | BD Pharmingen  | 557235           |
| Rat anti mouse CD16/32 (Mouse BD Fc Block) | 2.4G2   |              | BD Pharmingen  | 553142           |
| Mouse anti human CD34                      | 581     | APC          | BD Pharmingen  | 555824           |
| Mouse anti human CD33                      | WM53    | PE           | BD Pharmingen  | 555450           |
| anti mouse Ly-6G/Ly-6C (Gr1)               | RB6-8C5 | APC          | BioLegend      | 108412           |
| anti mouse CD117 (c-kit)                   | 2B8     | APC          | BioLegend      | 105812           |
| anti mouse CD19                            | 6D5     | APC          | BioLegend      | 115512           |
| anti mouse CD45.2                          | 104     | APC          | BioLegend      | 109814           |
| anti mouse CD45.1                          | A20     | FITC         | BioLegend      | 110706           |
| anti mouse Ly-6A/E (Sca1)                  | D7      | PE/Cy7       | BioLegend      | 108114           |
| anti mouse CD117 (c-kit)                   | 2B8     | APC/Cy7      | BioLegend      | 105826           |
| Mouse anti mouse CD45.1                    | A20     | PE           | BD Pharmingen  | 553776           |
| anti mouse CD45.2                          | 104     | Pacific Blue | BioLegend      | 109820           |
| Mouse anti mouse CD45.2                    | 104     | PerCP/Cy5.5  | BD Pharmingen  | 552950           |
| anti mouse CD117 (c-kit)                   | 2B8     | APC/Cy7      | BioLegend      | 105826           |
| Mouse anti mouse CD45.2                    | 104     | APC          | BD Pharmingen  | 558702           |
| BD Horizon V450 Streptavidin               |         |              | BD Biosciences | 580797           |
| Biotin - rat anti mouse CD5                | 53-7.3  |              | BD Pharmingen  | 553019           |

|                                         |          |                |           |
|-----------------------------------------|----------|----------------|-----------|
| Biotin - rat anti mouse CD8a            | 53-6.7   | BD Pharmingen  | 553029    |
| Biotin - rat anti mouse CD4             | H129.19  | BD Pharmingen  | 553649    |
| Biotin - anti mouse Ly-6G/Ly-6C (Gr1)   | RB6-8C5  | BioLegend      | 108404    |
| Biotin anti mouse/human CD45R/B220      | RA3-6B2  | BioLegend      | 103204    |
| Biotin antimouse/human CD11b            | M1/70    | BD Pharmingen  | 101204    |
| Biotin anti mouse Ter119                | Ter119   | BioLegend      | 116204    |
| Biotin Rat Anti-Mouse CD11b             | M1/70    | BD Pharmingen  | 553309    |
|                                         |          |                |           |
| c-Myc mouse anti-human                  | 9E10     | Pierce         | MA1-986   |
| c-Myc mouse anti-human                  | 9E10     | Santa Cruz     | sc-40     |
| phospho STAT5 rabbit anti-human         | C11C5    | Cell signaling | 9351      |
| Beta tubulin rabbit anti-human          | 9F3      | Cell Signaling | 2128      |
| GAPDH rabbit anti-human                 | 14C10    | Cell Signaling | 3294      |
| p53 mouse anti-human                    | DO-1     | Santa Cruz     | sc-126    |
| CIP2A mouse anti-human                  | 2G10-3B5 | Santa Cruz     | sc-80659  |
| aldose reductase rabbit anti-human      | F2-316   | Santa Cruz     | sc-33219  |
| heat-shock protein 90 rabbit anti-human | C45G5    | Cell Signaling | 4877      |
| UCHL1 rabbit anti-human                 | PGP9.5   | Sigma Prestige | HPA005993 |
| gelsolin mouse anti-human               | GS-2C4   | Abcam          | ab11081   |
